# Supplementary material
Source: PubMed Central journal article supplement (PMC9269587)

**Supplemental materials to:**

**Dapagliflozin and kidney outcomes in hospitalized patients with COVID-19 infection: An analysis of the DARE-19 randomized controlled trial**

**Heerspink HH et al.**

**Contents**

Supplemental Figure 1: The secondary kidney outcome by pre-specified subgroups ..... 2

Supplemental Figure 2: LS Mean eGFR (standard error) for all recorded local standard of care assessments in participants with eGFR <60 and ≥60 mL/min/1.73m<sup>2</sup> ..... 3

Supplemental Figure 3: Histogram of the change in eGFR from baseline to Day 3 in participants with baseline eGFR <60 mL/min/1.73m<sup>2</sup> (A), and those with baseline eGFR ≥60 mL/min/1.73m<sup>2</sup> (B)..... 4

**Supplemental Figure 1: The secondary kidney outcome by pre-specified subgroups**

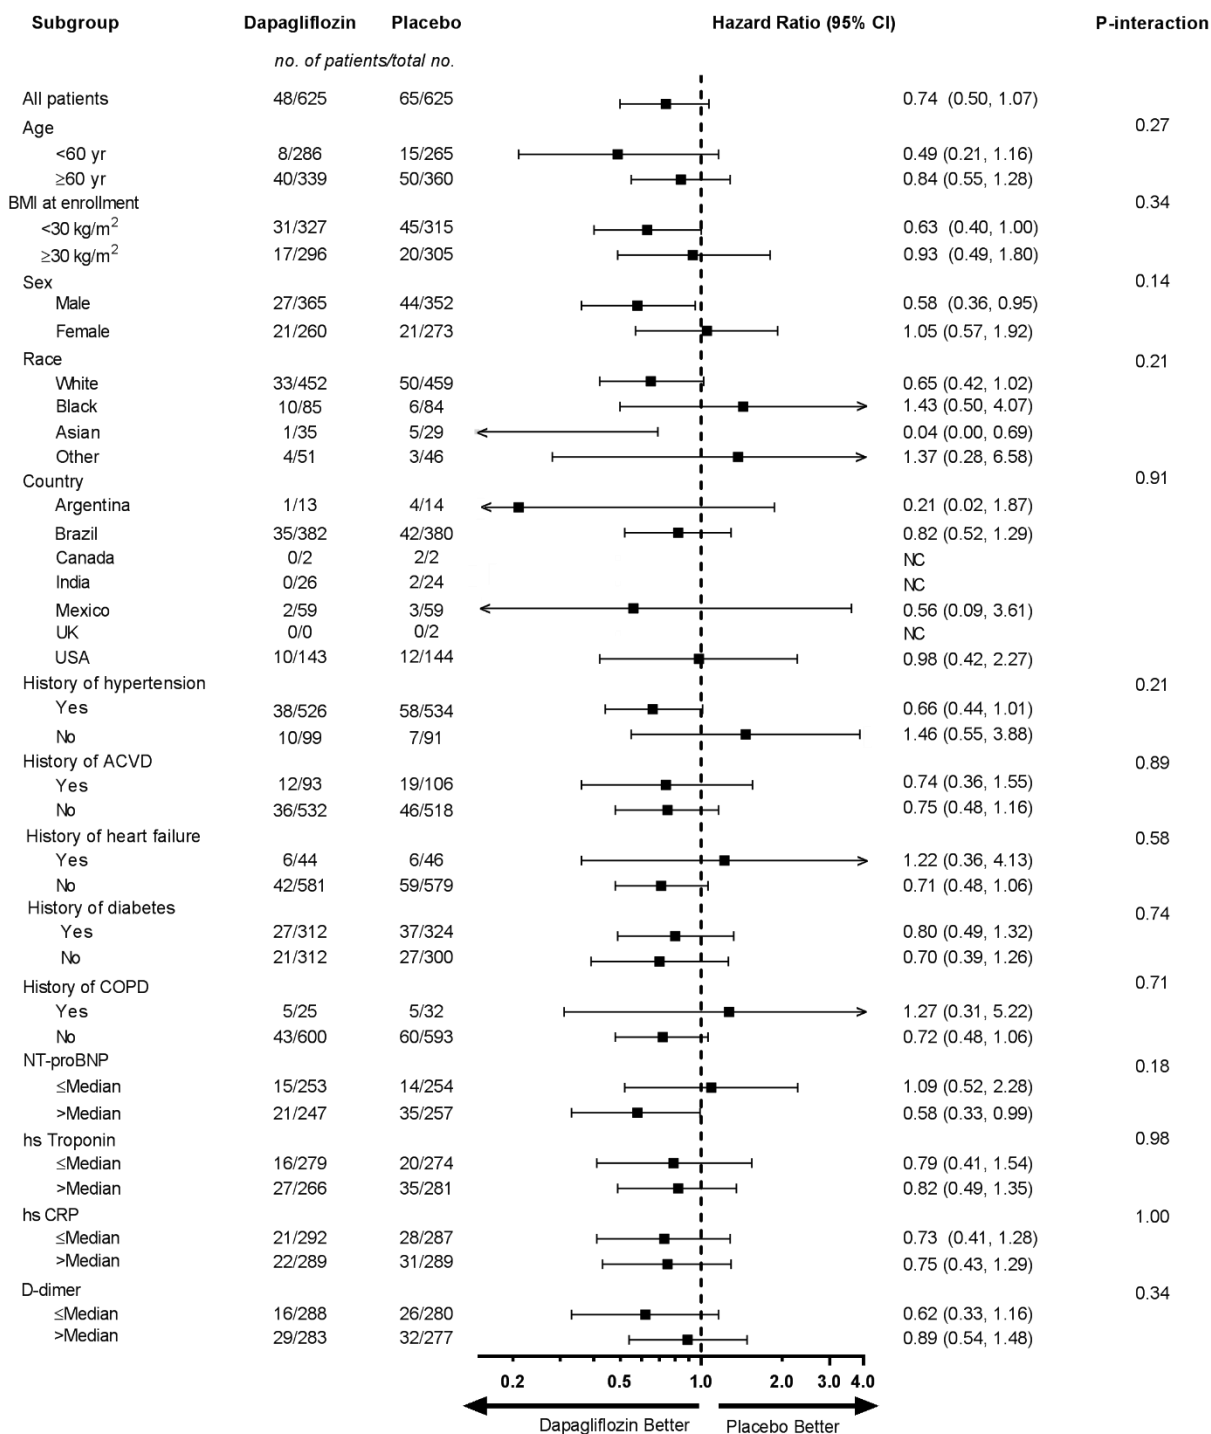

**Supplemental Figure 2: LS Mean eGFR (standard error) for all recorded local standard of care assessments in participants with eGFR <60 and ≥60 mL/min/1.73m<sup>2</sup>**

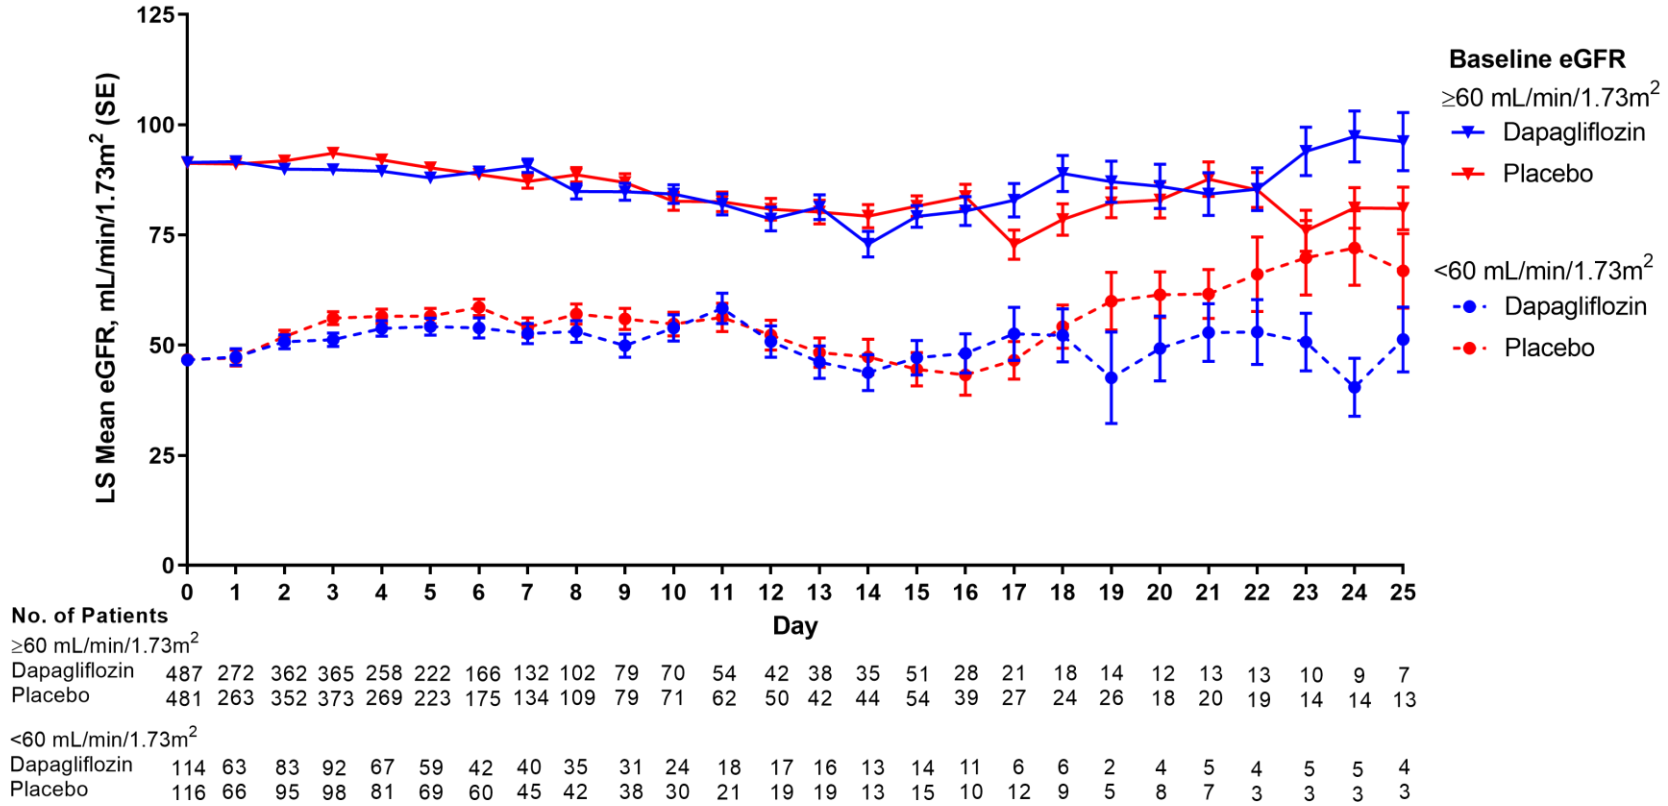

**Supplemental Figure 3: Histogram of the change in eGFR from baseline to Day 3 in participants with baseline eGFR <60 mL/min/1.73m<sup>2</sup> (A), and those with baseline eGFR ≥60 mL/min/1.73m<sup>2</sup> (B)**

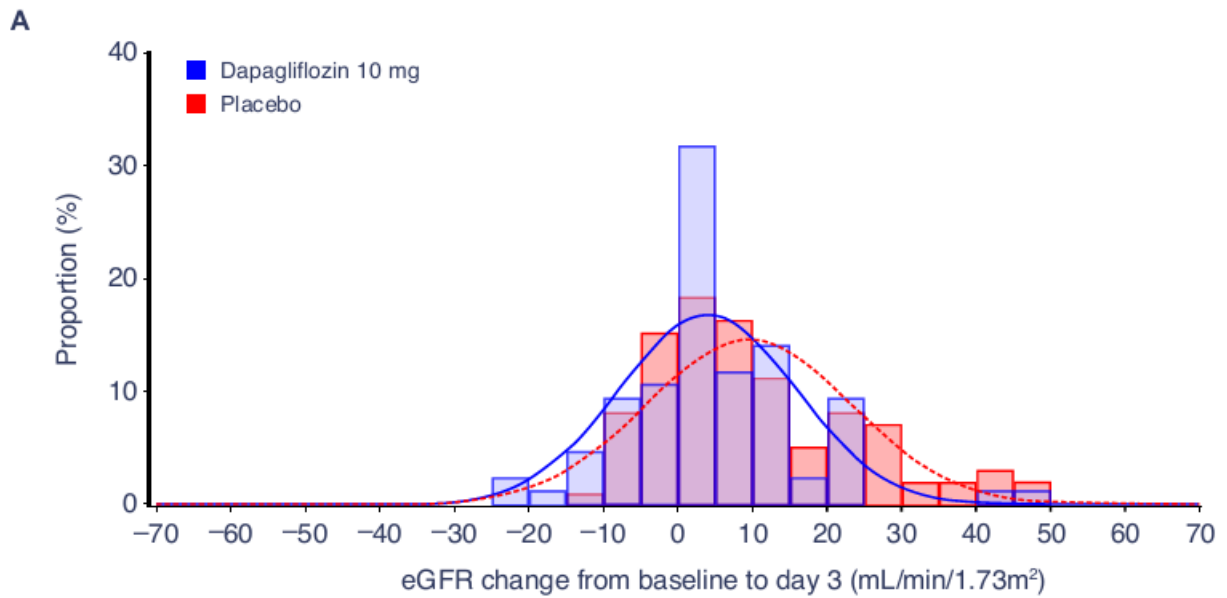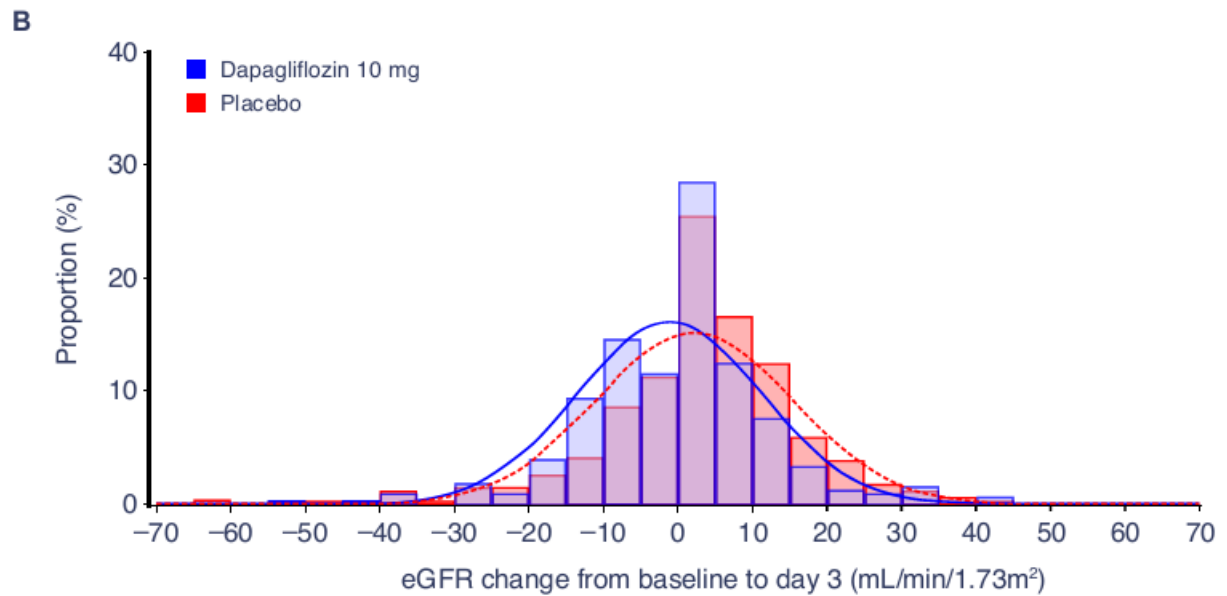

Supplement: CJN.14231021SupplementaryData.pdf [file CJN.14231021SupplementaryData.pdf]
